# Supplementary material for: Primary mismatch repair deficient IDH-mutant astrocytoma (PMMRDIA) is a distinct type with a poor prognosis
Source: Springer Nature journal article supplement (doi:10.1007/s00401-020-02243-6), 2020-11-20
Supplement: MOESM1 [file 18608302]

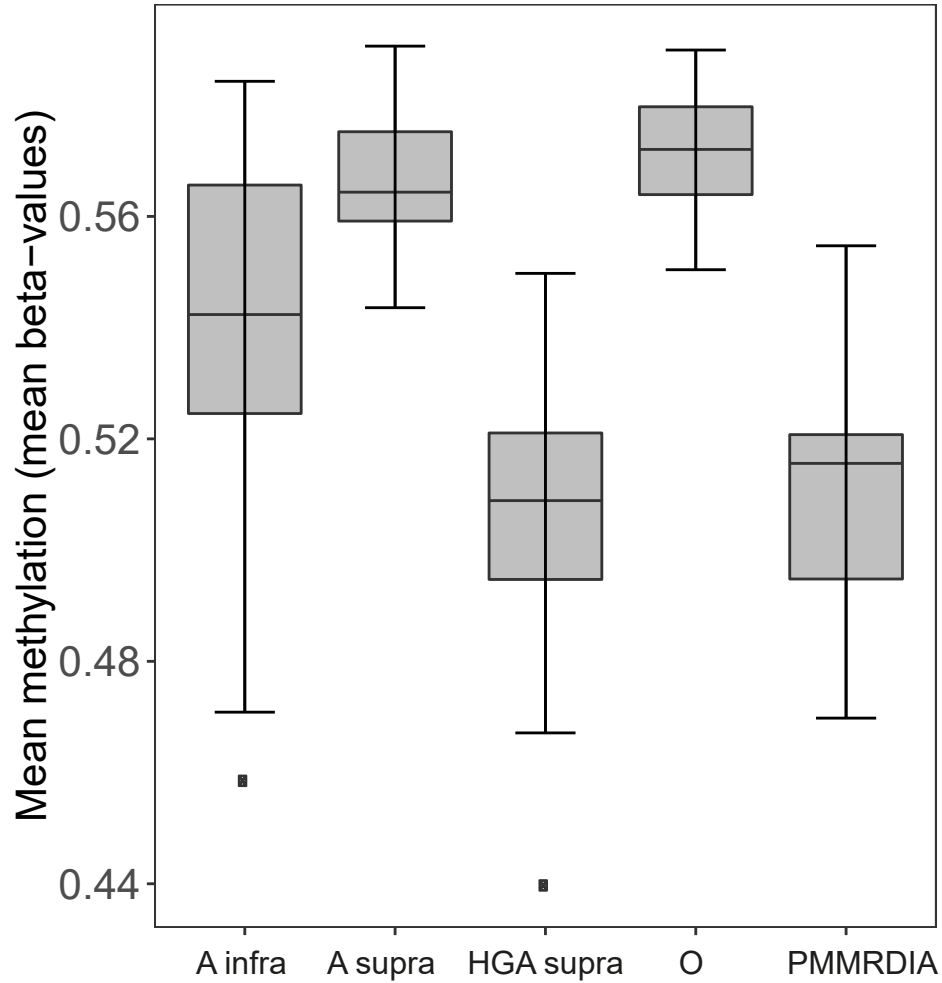

Mean methylation values among IDH-mutant gliomas. Beta-values vary from 0 (unmethylated) to 1 (fully methylated).

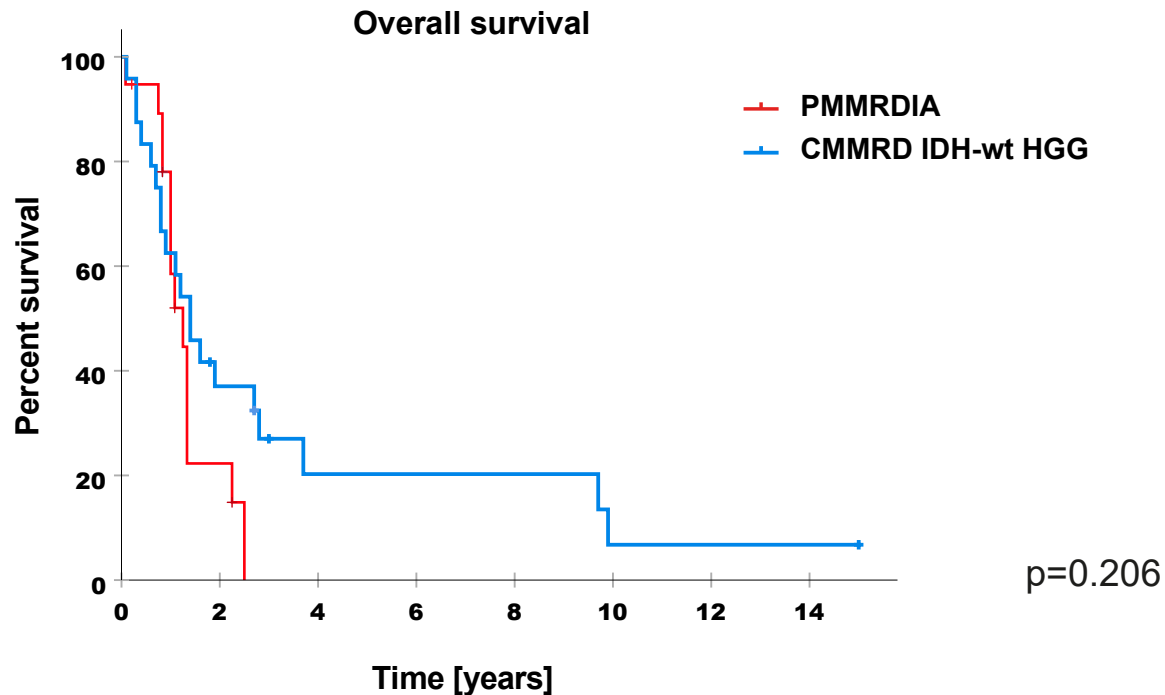

No. at risk

|   |    |   |   |   |   |   |   |   |
|---|----|---|---|---|---|---|---|---|
| — | 19 | 3 | 0 | 0 | 0 | 0 | 0 | 0 |
| — | 24 | 8 | 3 | 3 | 3 | 1 | 1 | 1 |

IDH-wt glioma data was taken from  
Guerrini-Rousseau et al., 2019 (PMID:32642664)

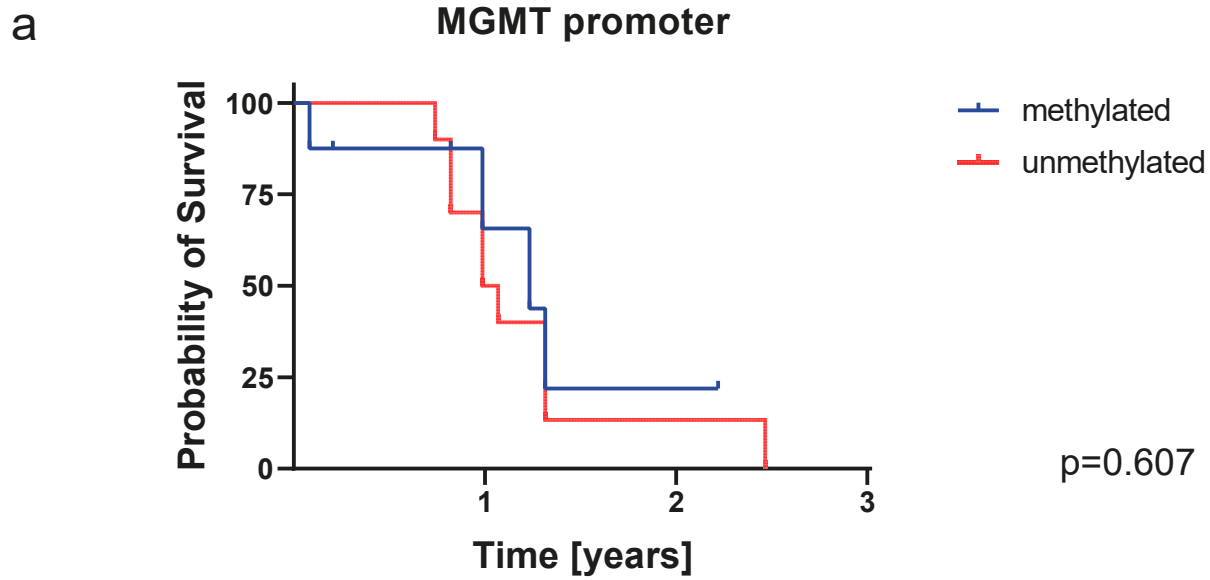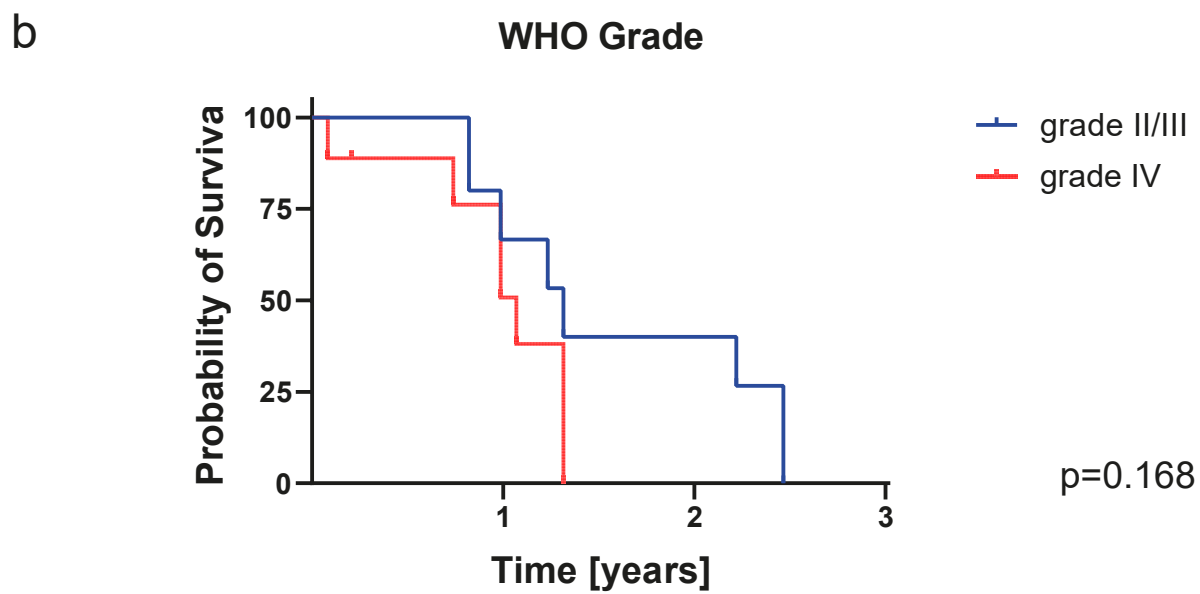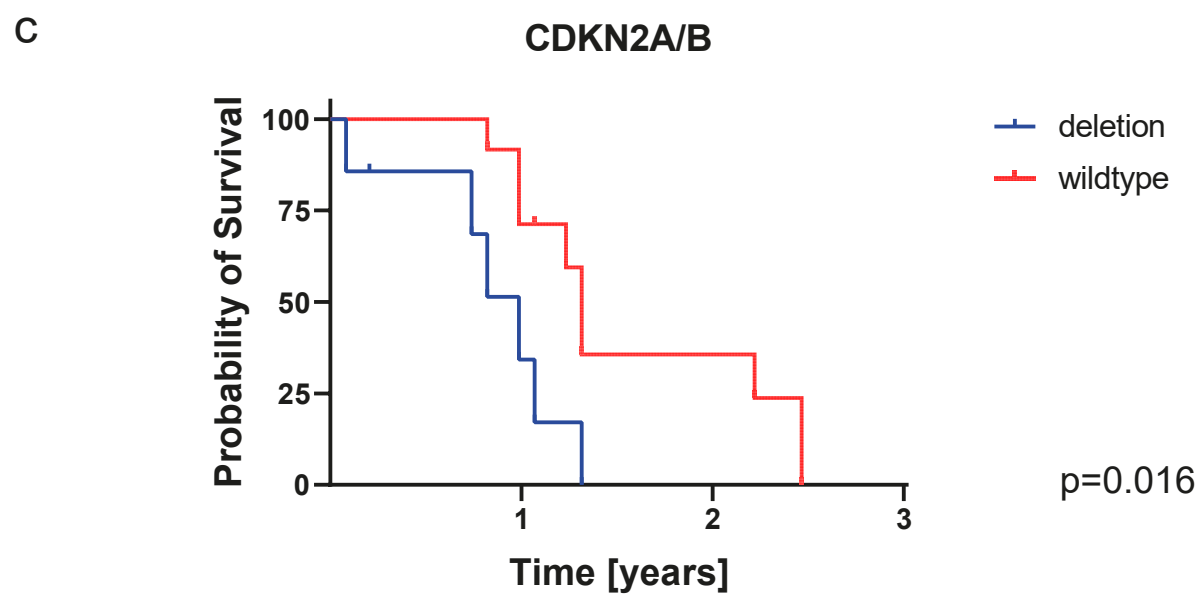

### Supplementary Table 1: Treatment of PMMRDIA

| No | Mut. | Syndrome | P/R | OS | PFS | Death | MGMT    | Loc. | Diagn. | Grade | Treatment                       |
|----|------|----------|-----|----|-----|-------|---------|------|--------|-------|---------------------------------|
| 1  | MSH6 | cMMRD    | P   | 10 | 10  | no    | meth    | H    | EPN    | III   |                                 |
| 2  | MLH1 |          | P   | 27 | 3   | yes   | not det | H    | astro  | III   | IR + TMZ (Stupp)                |
| 3  | MSH6 | cMMRD    | P   | 1  | 1   | yes   | meth    | H    | GBM    | IV    |                                 |
| 4  | MSH6 |          | P   | 15 | 10  | yes   | meth    | H    | oligo  | III   | IR + TMZ (Stupp), CCNU, Avastin |
| 5  | MSH2 |          | U   |    |     | yes   | unmeth  | H    | PNET   | IV    |                                 |
| 6  | MSH6 | Lynch    | P   | 12 | 8   | yes   | unmeth  | H    | GBM    | IV    | IR + TMZ (Stupp), TTF, IR       |
| 7  | MSH6 | cMMRD    | P   | 12 | 11  | yes   | meth    | H    | GBM    | IV    | IR, Nivolumab                   |
| 8  | MSH6 | cMMRD    | P   |    |     |       | unmeth  | H    | GBM    | IV    |                                 |
| 9  | MSH6 |          | U   |    |     |       | meth    |      | HGG    |       |                                 |
| 10 |      |          | P   | 16 | 10  | yes   | unmeth  |      | GBM    | IV    | only resection                  |
| 11 |      | cMMRD    | P   | 16 | 10  | yes   | meth    | H    | GBM    | IV    | IR, TMZ                         |
| 12 | MSH6 |          | U   |    |     |       | unmeth  |      | HGG    |       |                                 |
| 13 | MSH6 | cMMRD    | P   | 13 | 13  | no    | unmeth  | H    | GBM    | IV    | Nivolumab                       |
| 14 | MSH2 | Lynch    | P   | 12 | 6   | yes   | unmeth  | H    | astro  | II    | IR, TMZ, Pembrolizumab          |
| 15 | MSH2 | Lynch    | P   | 6  |     | no    | unmeth  | H    | GBM    | IV    | IR, TMZ, CCNU                   |
| 16 | MSH6 |          | P   | 16 | 11  | yes   | unmeth  | H    | astro  | III   | IR, TMZ                         |
| 17 |      |          | R   | 27 | 27  | no    | meth    | H    | GBM    | IV    | IR + TMZ (Stupp), CCNU          |
| 18 |      |          | P   | 30 | 10  | yes   | unmeth  | H    | astro  | III   | IR + TMZ (Stupp), CCNU, Avastin |
| 19 | MSH6 | cMMRD    | P   | 10 |     | yes   | unmeth  | H    | astro  | III   |                                 |
| 20 | MLH1 | Lynch    | P   | 10 |     | no    | meth    | H    | astro  | III   |                                 |
| 21 | MSH6 | cMMRD    | P   | 13 |     | yes   | unmeth  | PF   | GBM    | IV    |                                 |
| 22 | MSH6 | Lynch    | P   | 2  | 2   | no    | meth    | H    | GBM    | IV    | IR, CCNU                        |
| 23 |      |          | P   | 10 |     | yes   | unmeth  | H    | astro  | III   | IR, TMZ                         |
| 24 |      |          | P   |    |     | yes   | unmeth  | H    | GBM    | IV    |                                 |
| 25 |      |          | P   | 9  | 9   | yes   | unmeth  |      | GBM    | IV    | TMZ                             |
| 26 |      |          | U   |    |     |       | unmeth  |      |        |       |                                 |
| 27 |      |          | U   |    |     |       | meth    |      |        |       |                                 |
| 28 |      |          | U   |    |     |       | unmeth  |      |        |       |                                 |
| 29 |      |          | U   |    |     |       | meth    |      |        |       |                                 |
| 30 |      |          | U   |    |     |       | meth    |      |        |       |                                 |
| 31 |      |          | U   |    |     |       | unmeth  |      |        |       |                                 |
| 32 |      |          | U   |    |     |       | unmeth  |      |        |       |                                 |
